# Supplementary material for: A missense variant in SLC39A8 confers risk for Crohn’s disease by disrupting manganese homeostasis and intestinal barrier integrity
Source: PubMed Central journal article supplement — Proc Natl Acad Sci U S A. 2020 Nov 2;117(46):28930–8. doi: 10.1073/pnas.2014742117 (PMC7682327; doi:10.1073/pnas.2014742117), 2020-11-02
Supplement: pnas.2014742117.sapp.pdf [file pnas.2014742117.sapp.pdf]

# PNAS

www.pnas.org

## Supplementary Information for

A Missense Variant in *SLC39A8* Confers Risk for Crohn's Disease by Disrupting Manganese Homeostasis and Intestinal Barrier Integrity

Toru Nakata<sup>1,2,3</sup>, Elizabeth A. Creasey<sup>1,2,3</sup>, Motohiko Kadoki<sup>1,2,3</sup>, Helen Lin<sup>1,2,3</sup>, Martin K. Selig<sup>4</sup>, Junmei Yao<sup>1,2,3</sup>, Ariel Lefkovith<sup>1</sup>, Mark J. Daly<sup>1,5</sup>, Daniel B. Graham<sup>1,2,3,\*</sup>, and Ramnik J. Xavier<sup>1,2,3,\*</sup>.

<sup>1</sup>Broad Institute of MIT and Harvard, Cambridge, MA, USA

<sup>2</sup>Center for Computational and Integrative Biology, Massachusetts General Hospital and Harvard Medical School, Boston, MA, USA

<sup>3</sup>Department of Molecular Biology, Massachusetts General Hospital and Harvard Medical School, Boston, MA, USA

<sup>4</sup>Pathology Service, Massachusetts General Hospital, Harvard Medical School, Boston, MA, USA

<sup>5</sup>Analytical and Translational Genetics Unit, Massachusetts General Hospital, Boston, Massachusetts 02114, USA

\*Correspondence to: [dgraham@broadinstitute.org](mailto:dgraham@broadinstitute.org), [xavier@molbio.mgh.harvard.edu](mailto:xavier@molbio.mgh.harvard.edu)

## This PDF file includes:

Figures S1 to S6

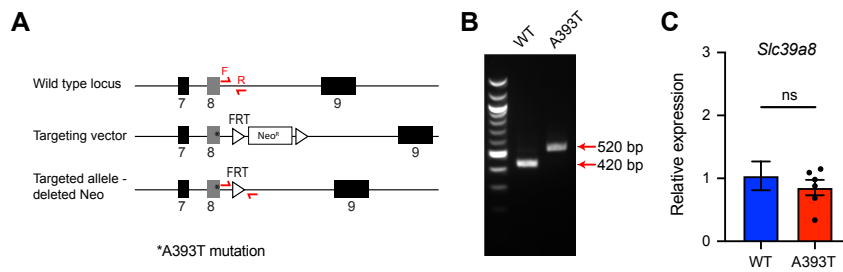

**Fig. S1. Generation of *Slc39a8* A391T knock-in mouse.**

(A) Strategy for generating *Slc39a8* A391T knock-in mice. A393T missense variant (corresponding to human A391T) was introduced into the *Slc39a8* locus by gene targeting. (B) PCR analysis of genomic DNA isolated from WT and A391T mice. (C) Quantitative analysis of *Slc39a8* expression in the colonic epithelial cells isolated from WT and A391T mice (n=4-6 per genotype). The values were normalized to *Gapdh* expression. Similar results were obtained in two independent experiments. A two-tailed unpaired t-test was used for statistical analysis. Data represent mean ± SEM.

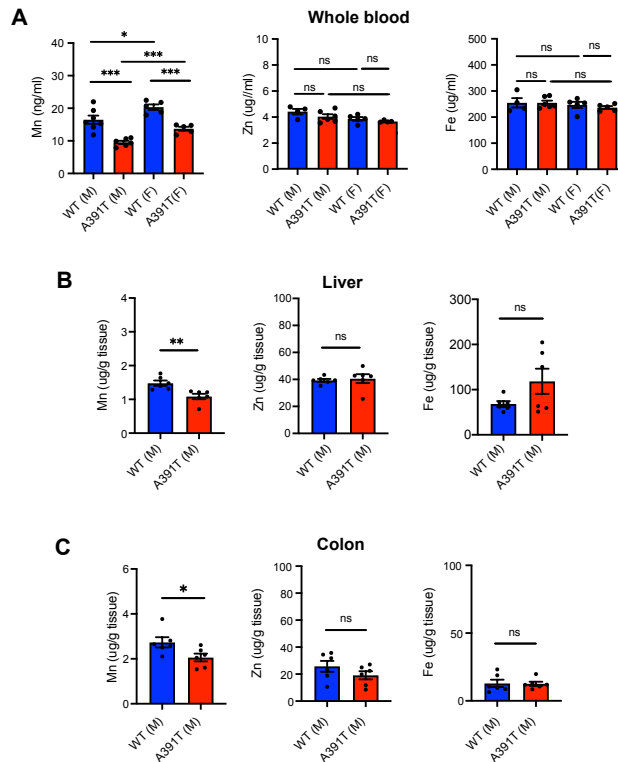

**Fig. S2. *Slc39A8* A391T male mice show severe Mn deficiency in the blood and tissues.**

(**A, B, C**) Trace element levels (Mn, Zn, Fe) in whole blood (**A**), liver (**B**) and colon (**C**) of WT and *Slc39a8* A391T mice. Trace element measurement was performed by ICP-MS (n=4-6 mice per genotype). Similar results were obtained in at least two independent experiments. \*p<0.05, \*\*<0.01, \*\*\*<0.001 using one-way ANOVA with Tukey's multiple comparison test (**A**) and a two-tailed unpaired t-test (**B, C**). All data represent mean±SEM.

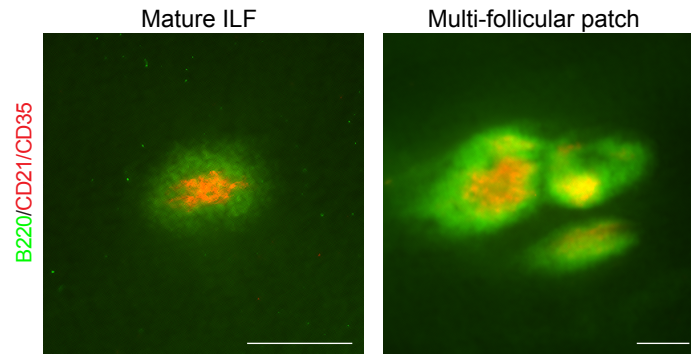

**Fig. S3. Whole-mount immunostaining of lymphoid tissues.** Representative image of mature lymphoid follicle (mILF) and multifollicular patch. Colon tissues were stained with B220 (green) and CD21/CD35 (red) antibodies. Scale bar, 500  $\mu$ m.

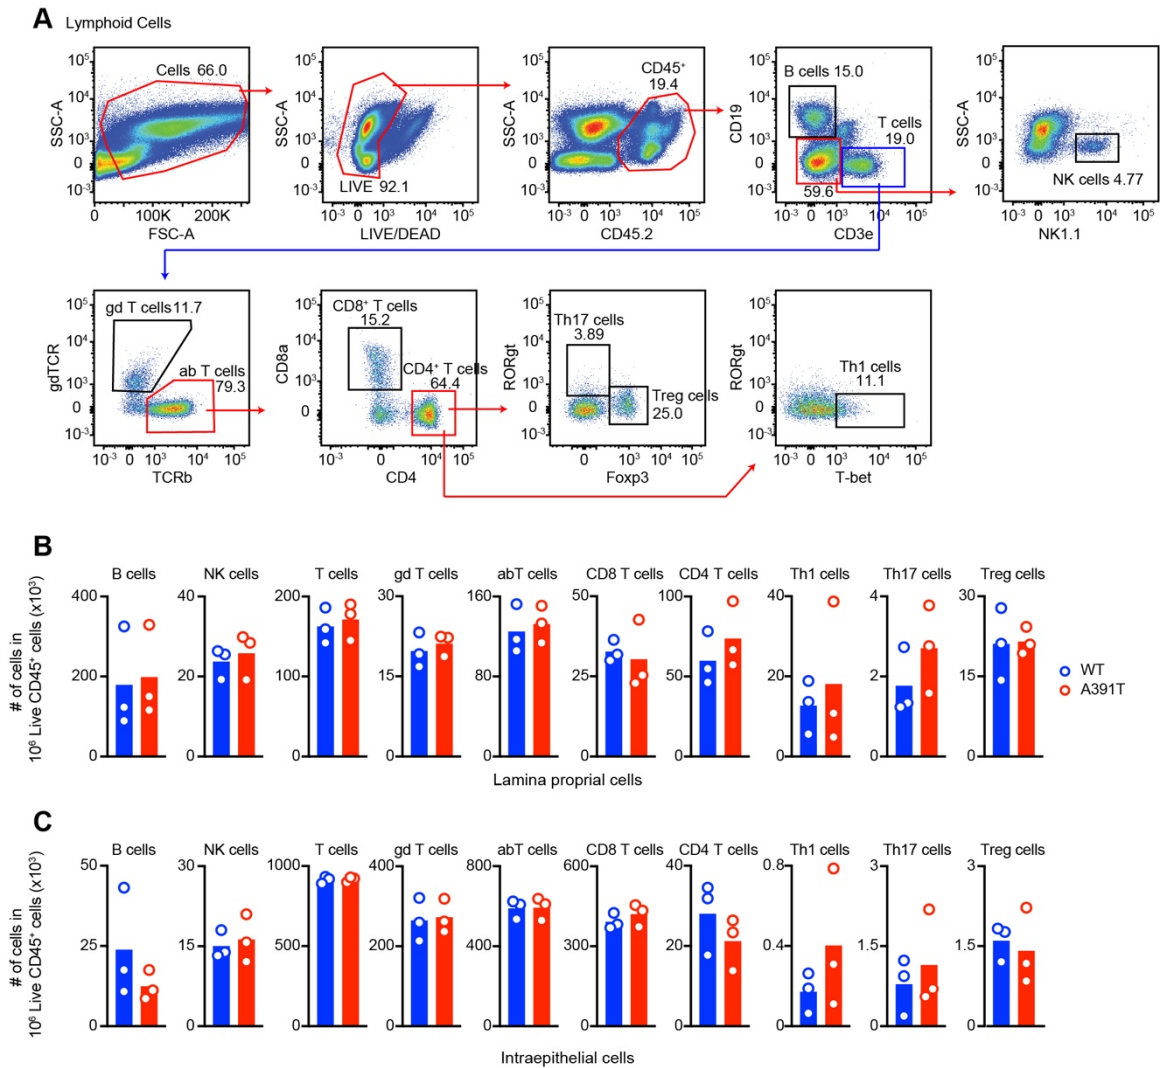

**Fig. S4. Immunophenotyping of colonic lymphoid cells.**

WT and A391T male mice were used ( $n=3$  per genotype). **(A)** Gating strategy of lymphoid cell populations. Gates used for descendent analyses are shown in red or blue and directed by the same color arrows. Representative plots were shown from colonic lamina propria cells. **(B)** Relative amount of the lymphoid cell population per  $10^6$  live CD45<sup>+</sup> lamina propria cells. **(C)** Relative amount of the lymphoid cell populations per  $10^6$  live CD45<sup>+</sup> intraepithelial cells. In **(B)** and **(C)**, each dot represents a sample from one mouse and each bar represents an average of replicate samples. Similar results were obtained in two independent experiments.

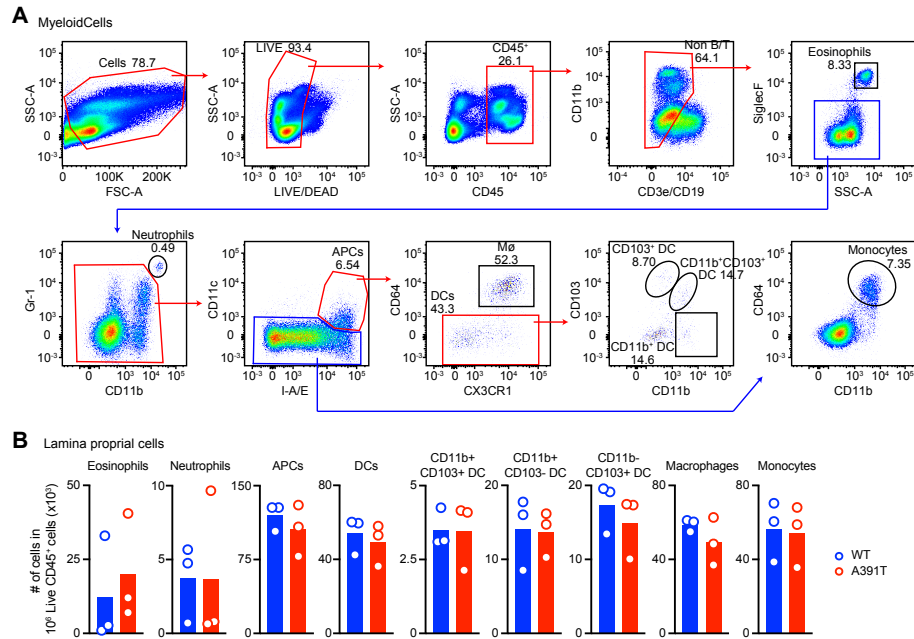

**Figure S5. Immunophenotyping of colonic myeloid cells.**

WT and A391T male mice were used (n=3 per genotype). **(A)** Gating strategy of myeloid cell populations. Gates used for descendent analyses are shown in red or blue and directed by the same color arrows. Representative plots were shown from colon lamina propria cells. **(B)** Relative amount of the myeloid cell populations per 10<sup>6</sup> live CD45+ lamina propria cells. Each dot represents a sample from one mouse and each bar represents an average of replicate samples. Similar results were obtained in two independent experiments.

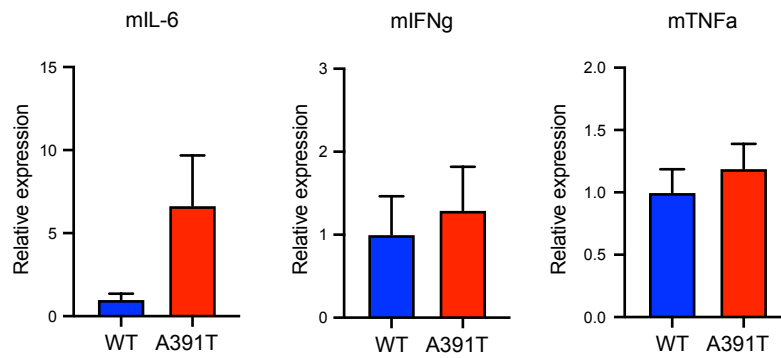

**Figure S6. Proinflammatory cytokine levels in *Slc39a8* WT and *Slc39a8* A391T mice following DSS treatment.**

qRT-PCR analysis of proinflammatory cytokine levels in the distal colon of *Slc39a8* WT and *Slc39a8* A391T mice on day 10 (n=6 per genotype). Data are representative of two independent experiments. All data represent mean  $\pm$  SEM.
